# Supplementary material
Source: PubMed Central journal article supplement (PMC5948988)
Supplement: pnas.201722246SI.pdf [file pnas.201722246SI.pdf]

# Supporting Information

Yeom et al. 10.1073/pnas.1722246115

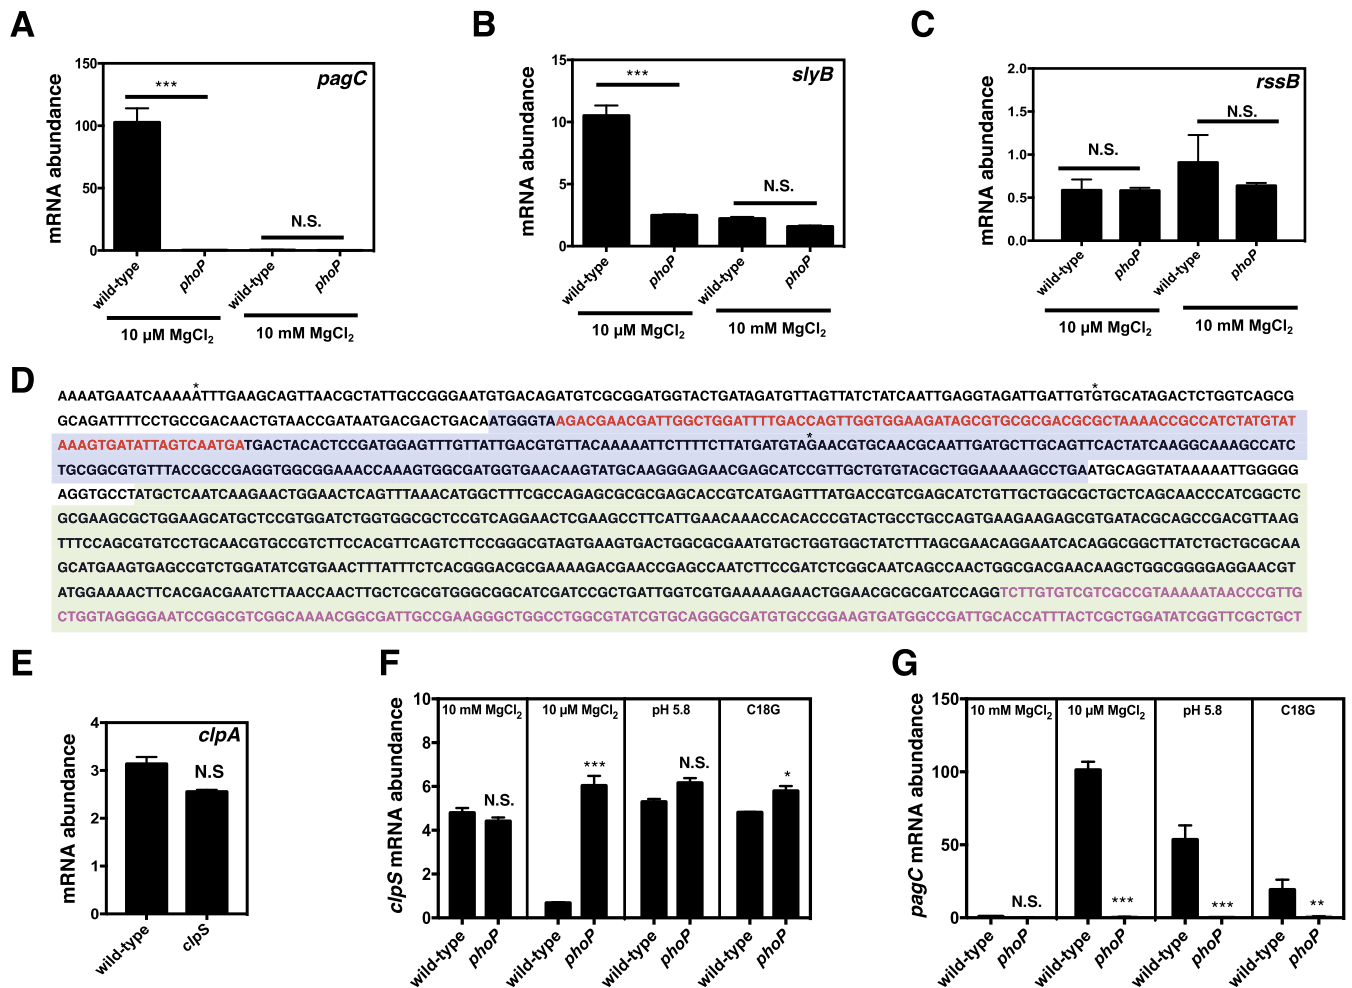

**Fig. S1.** The PhoP protein represses transcription of the *clpS* gene when *Salmonella* experiences low cytoplasmic Mg<sup>2+</sup>. (A–C) mRNA abundance of the *pagC* (A), *slyB* (B), and *rssB* (C) genes produced by wild-type (14028s) and *phoP* (MS7953s) *Salmonella* following growth in N-minimal medium (pH 7.7) containing 10 μM or 10 mM MgCl<sub>2</sub> at 37 °C for 5 h. (D) Nucleotide sequence of the *clpS* (blue) and *clpA* (green) coding regions from wild-type *S. enterica* serovar Typhimurium (14028s). The locations of qRT-PCR primers for the *clpS* and *clpA* genes are indicated by red and pink font, respectively. Intergenic regions are in white background. The asterisks indicate transcription start sites for the *clpS* and the *clpA* genes according to the *Salmonella* gene-expression database ([bioinf.gen.tcd.ie/cgi-bin/salcom.pl?\\_HL](http://bioinf.gen.tcd.ie/cgi-bin/salcom.pl?_HL)). (E) mRNA abundance of the *clpA* gene produced by wild-type (14028s) and *clpS* (JY651) *Salmonella* following growth in N-minimal medium (pH 7.7) containing 10 μM MgCl<sub>2</sub> at 37 °C for 5 h. (F and G) mRNA abundance of the *clpS* (F) and *pagC* (G) genes produced by wild-type (14028s) and *phoP* (MS7953s) *Salmonella* following growth in N-minimal medium containing 10 mM or 10 μM MgCl<sub>2</sub> at pH 7.7 or 10 mM MgCl<sub>2</sub> at pH 5.8 or 10 mM MgCl<sub>2</sub> at pH 7.7 with C18G (7 μg/mL) at 37 °C for 5 h. For A–C and E–G, mRNA abundance was normalized to that of the *ompA* gene. Primers used in qRT-PCR are listed in Table S2. Data shown are the mean and SD from three independent experiments. N.S., not significant. \**P* < 0.05, \*\**P* < 0.01, \*\*\**P* < 0.001, two-tailed *t* test with each sample vs. wild-type.



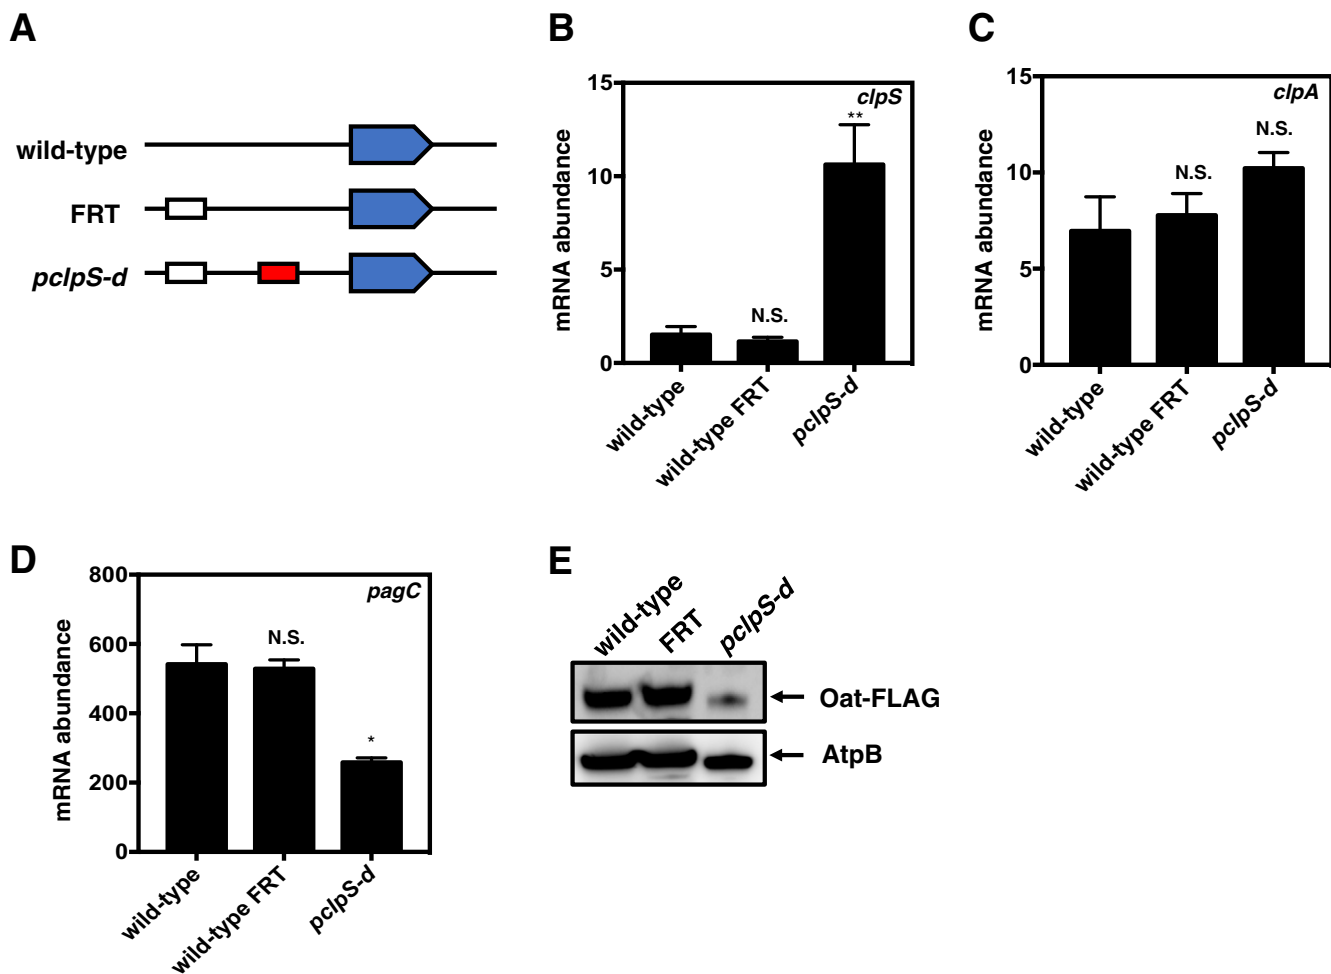

**Fig. 53.** The 83-nt-long FRT sequence upstream of the *clpS* promoter does not alter *clpS* expression. (A) Diagram of the *clpS* promoter chromosomal region in wild-type *Salmonella*, a strain with the 83-nt-long FRT sequence upstream of the *clpS* promoter (white box), and a strain with the 83-nt-long FRT sequence upstream of the mutant *clpS* promoter (red box). (B–D) mRNA abundance of the *clpS* (B), *clpA* (C), and *pagC* (D) genes produced by wild-type (14028s), wild-type FRT (JY937), and *pclpS-d* (JY665) *Salmonella* following growth in N-minimal medium (pH 7.7) containing 10  $\mu$ M MgCl<sub>2</sub> at 37 °C for 5.5 h. mRNA abundance was normalized to that of the *ompA* gene. Primers used in qRT-PCR are listed in Table S2. Data shown are the mean and SD from three independent experiments. (E) Western blot analysis of crude extracts prepared from *oat-FLAG* (JY655), *oat-FLAG* FRT (JY938), and *oat-FLAG* *pclpS-d* (JY684) *Salmonella* following growth in N-minimal medium (pH 7.7) containing 10  $\mu$ M MgCl<sub>2</sub> at 37 °C for 6 h. Samples were analyzed using antibodies directed to the FLAG tag or the AtpB protein. N.S., not significant. \* $P < 0.05$ , \*\* $P < 0.01$ , two-tailed *t* test with each sample vs. wild-type.

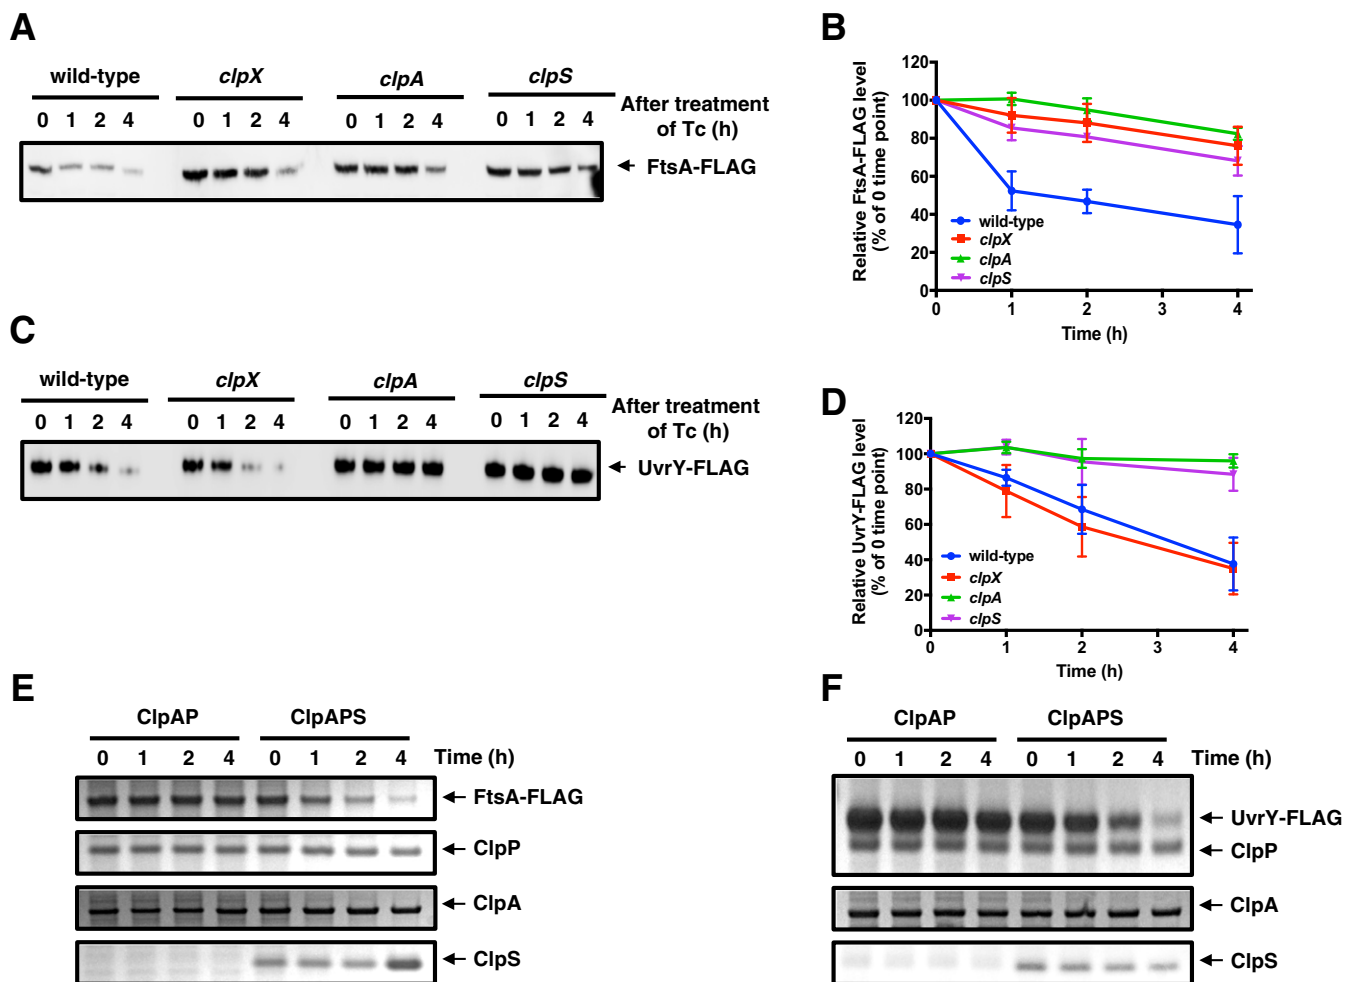

**Fig. S4.** The FtsA-FLAG and UvrY-FLAG proteins are substrates of the ClpSAP protease. (A and C) FtsA-FLAG (A) stability determined in *ftsA-FLAG* (JY905), *ftsA-FLAG clpX* (JY909), *ftsA-FLAG clpA* (JY910), and *ftsA-FLAG clpS* (JY907) *Salmonella*. UvrY-FLAG (C) stability determined in *uvrY-FLAG* (JY911), *uvrY-FLAG clpX* (JY915), *uvrY-FLAG clpA* (JY916), and *uvrY-FLAG clpS* (JY913) *Salmonella*. Bacteria were grown in 10 mL N-minimal medium containing 10  $\mu$ M MgCl<sub>2</sub> for 5 h. Samples were harvested at the indicated times following the addition of the protein synthesis inhibitor tetracycline (Tc) (50  $\mu$ g/mL) and were analyzed by Western blotting with antibodies directed to the FLAG tag. (B and D) Relative FtsA-FLAG (B) and UvrY-FLAG (D) abundance was calculated from three independent experiments. (E and F) SDS/PAGE analysis for the time course of in vitro degradation of purified FtsA-FLAG (E) and UvrY-FLAG (F) proteins. FtsA-FLAG (0.2  $\mu$ M) or UvrY-FLAG (0.5  $\mu$ M) was mixed with ClpA (0.2  $\mu$ M) or ClpP (0.2  $\mu$ M) in the absence or presence of ClpS (0.2  $\mu$ M). All reactions were carried out at 30 °C for the indicated times in the presence of an ATP regeneration system and were started by the addition of substrates. After incubation, protein amounts were determined by a Coomassie-stained band following separation on a 4–12% SDS/PAGE gel. Data are representative of three independent experiments, which gave similar results.

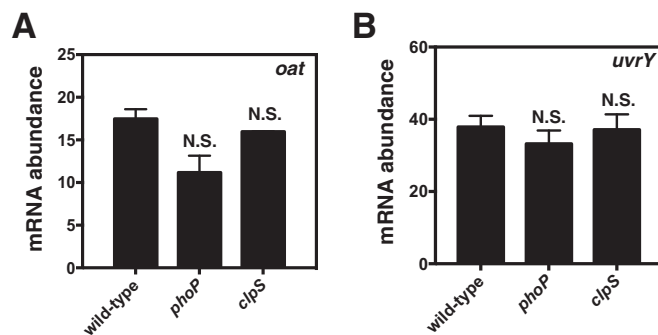

**Fig. S5.** *phoP* and *clpS* mutants exhibit wild-type mRNA abundance of the *oat* and *uvrY* genes. mRNA abundance of the *oat* (A) and *uvrY* (B) genes produced by wild-type (14028s), *phoP* (MS7953s), and *clpS* (JY651) *Salmonella* following growth in N-minimal medium (pH 7.7) containing 10  $\mu$ M MgCl<sub>2</sub> at 37 °C for 5.5 h. mRNA abundance was normalized to that of the *ompA* gene. Primers used in qRT-PCR are listed in Table S2. Data shown are the mean and SD from three independent experiments. N.S., not significant.

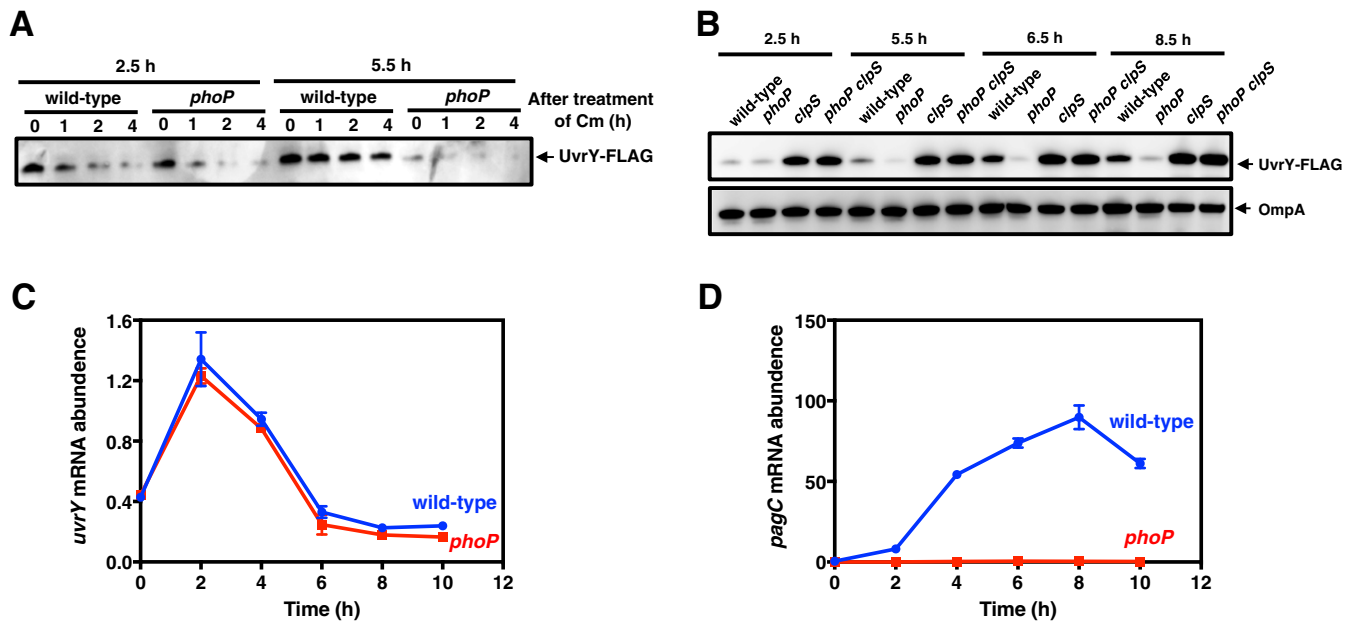

**Fig. S6.** Stability of the UvrY-FLAG protein increases following *Salmonella* growth in low  $Mg^{2+}$  medium for 5.5 h when the abundance of *uvrY* mRNA is low. (A) UvrY-FLAG stability determined in *uvrY-FLAG* (JY911) and *uvrY-FLAG phoP* (JY912) *Salmonella*. Bacteria were grown in 10 mL N-minimal medium containing  $10 \mu M$   $MgCl_2$  for 2.5 or 5.5 h. Samples were harvested at the times indicated in the figure following the addition of the protein synthesis inhibitor chloramphenicol (Cm) (1 mg/mL) and were analyzed by Western blotting with antibodies directed to the FLAG epitope. Data are representative of two independent experiments, which gave similar results. (B) Western blot analysis of crude extracts prepared from *uvrY-FLAG* (JY911), *uvrY-FLAG phoP* (JY912), *uvrY-FLAG clpS* (JY913), and *uvrY-FLAG clpS phoP* double mutant (JY983) *Salmonella* following growth in N-minimal medium (pH 7.7) containing  $10 \mu M$   $MgCl_2$  at  $37^\circ C$  for the indicated times. Samples were analyzed using antibodies directed to the FLAG tag or the OmpA protein. Data are representative of two independent experiments, which gave similar results. (C and D) mRNA abundance of the *uvrY* (C) and *pagC* (D) genes produced by wild-type (14028s) and *phoP* (MS7953s) *Salmonella* following growth in N-minimal medium (pH 7.7) containing  $10 \mu M$   $MgCl_2$  at  $37^\circ C$  for the indicated times. mRNA abundance was normalized to that of the *ompA* gene. Primers used in qRT-PCR are listed in Table S2. Data shown are the mean and SD from three independent experiments.

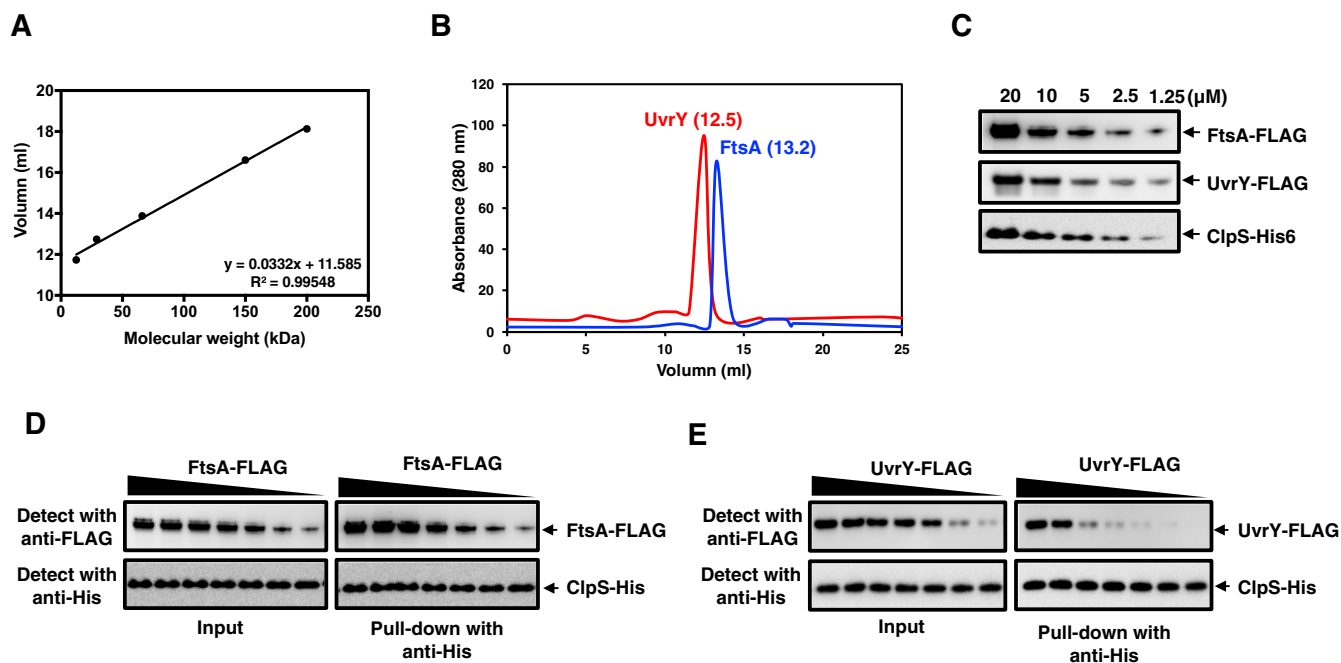

**Fig. S7.** The FtsA-FLAG and UvrY-FLAG proteins are monomeric and have different affinities toward ClpS. (A and B) Molecular weight of the FtsA-FLAG and UvrY-FLAG proteins calculated based on purified standard proteins. (A) Cytochrome *c*, carbonic anhydrase, albumin, alcohol dehydrogenase, and  $\beta$ -amylase were used as the standard proteins for molecular weight calculation. (B) Purified FtsA-FLAG and UvrY-FLAG protein were run in size-exclusion chromatography. FtsA-FLAG and UvrY-FLAG have peaks at 13.2 and 12.5 mL, respectively. (C) Calculated concentrations of the FtsA-FLAG, UvrY-FLAG, and ClpS-His proteins based on known amounts of purified proteins. The indicated amounts of purified proteins were loaded onto the same gel and detected using antibodies directed to the FLAG or His tags. (D and E) In vitro protein-protein interactions determined by coimmunoprecipitation of purified ClpS-His, FtsA-FLAG, and UvrY-FLAG proteins followed by Western blot analysis using antibodies directed against the FLAG or His tags. (D) Affinity between ClpS-His and FtsA-FLAG measured at different amounts of FtsA-FLAG and a constant amount of ClpS-His by Western blot analysis using the antibodies described in C. (E) Affinity between ClpS-His and UvrY-FLAG measured using different amounts of UvrY-FLAG and a constant amount of ClpS-His by Western blot analysis using the antibodies described in C.

**Table S1. Bacterial strains and plasmids used in this study**

| Strains                                | Relevant characteristics                                                             | Source or reference |
|----------------------------------------|--------------------------------------------------------------------------------------|---------------------|
| <i>E. coli</i>                         |                                                                                      |                     |
| BL21 (DE3)                             | <i>F- ompT hsdS gal [lon] [dcat] (Its857 ind1 Sam7 nin5 lacUV5-T7 gene 1)</i>        | (62)                |
| DH5a                                   | Host strain used for generation and propagation of plasmid constructs                | Life Technologies   |
| EG12976                                | <i>phoP::km</i>                                                                      | (63)                |
| JY670                                  | <i>patA-FLAG::cat</i>                                                                | This study          |
| JY671                                  | <i>patA-FLAG::cat phoP::km</i>                                                       | This study          |
| JY680                                  | <i>clpS::km</i>                                                                      | This study          |
| JY681                                  | <i>patA-FLAG::cat clpS::km</i>                                                       | This study          |
| MG1655                                 | <i>F- lambda- rph-1</i>                                                              | (64)                |
| <i>S. enterica</i> serovar Typhimurium |                                                                                      |                     |
| 14028s                                 | wild-type                                                                            | (59)                |
| EG13918                                | <i>phoP-HA</i>                                                                       | (65)                |
| EG16735                                | $\Delta$ <i>mgtA</i>                                                                 | (27)                |
| EG17133                                | $\Delta$ <i>iraP</i>                                                                 | (37)                |
| EG18499                                | <i>clpX::cat</i>                                                                     | (37)                |
| EL1                                    | <i>mgtC::km</i>                                                                      | (60)                |
| EL4                                    | $\Delta$ <i>mgtC</i>                                                                 | (20)                |
| JY199                                  | <i>clpA::cat</i>                                                                     | (7)                 |
| JY570                                  | <i>clpS::cat</i>                                                                     | (7)                 |
| JY619                                  | $\Delta$ <i>clpS phoP::Tn10</i>                                                      | (7)                 |
| JY649                                  | $\Delta$ <i>clpX</i>                                                                 | (7)                 |
| JY650                                  | $\Delta$ <i>clpA</i>                                                                 | (7)                 |
| JY651                                  | $\Delta$ <i>clpS</i>                                                                 | (7)                 |
| JY655                                  | <i>oat-FLAG</i>                                                                      | (7)                 |
| JY656                                  | <i>oat-FLAG phoP::Tn10</i>                                                           | This study          |
| JY657                                  | <i>oat-FLAG clpS</i>                                                                 | (7)                 |
| JY658                                  | <i>oat-FLAG phoP::Tn10/clpS</i>                                                      | This study          |
| JY664                                  | <i>pclpS-d::cat</i>                                                                  | This study          |
| JY665                                  | $\Delta$ <i>pclpS-d</i>                                                              | This study          |
| JY684                                  | <i>oat-FLAG pclpS-d</i>                                                              | This study          |
| JY691                                  | <i>clpS-HA</i>                                                                       | This study          |
| JY694                                  | <i>clpA-HA</i>                                                                       | This study          |
| JY854                                  | <i>clpS-HA phoP::Tn10</i>                                                            | This study          |
| JY879                                  | <i>phoP-HA mgtC</i>                                                                  | This study          |
| JY881                                  | <i>phoP-HA clpS</i>                                                                  | This study          |
| JY903                                  | <i>oat::cat</i>                                                                      | This study          |
| JY905                                  | <i>ftsA-FLAG::km</i>                                                                 | This study          |
| JY906                                  | <i>ftsA-FLAG::km phoP::Tn10</i>                                                      | This study          |
| JY907                                  | <i>ftsA-FLAG::km clpS::cat</i>                                                       | This study          |
| JY908                                  | <i>ftsA-FLAG::km pclpS-d</i>                                                         | This study          |
| JY909                                  | <i>ftsA-FLAG::km clpX::cat</i>                                                       | This study          |
| JY910                                  | <i>ftsA-FLAG::km clpA::cat</i>                                                       | This study          |
| JY911                                  | <i>uvrY-FLAG::km</i>                                                                 | This study          |
| JY912                                  | <i>uvrY-FLAG::km phoP::Tn10</i>                                                      | This study          |
| JY913                                  | <i>uvrY-FLAG::km clpS::cat</i>                                                       | This study          |
| JY914                                  | <i>uvrY-FLAG::km pclpS-d</i>                                                         | This study          |
| JY915                                  | <i>uvrY-FLAG::km clpX::cat</i>                                                       | This study          |
| JY916                                  | <i>uvrY-FLAG::km clpA::cat</i>                                                       | This study          |
| JY917                                  | <i>uvrY::cat</i>                                                                     | This study          |
| JY933                                  | <i>phoP-HA pclpS-d</i>                                                               | This study          |
| JY934                                  | <i>clpS-HA pclpS-d</i>                                                               | This study          |
| JY935                                  | <i>clpA-HA pclpS-d</i>                                                               | This study          |
| JY936                                  | $\Delta$ <i>iraP pclpS-d</i>                                                         | This study          |
| JY937                                  | <i>pclpS::FRT</i>                                                                    | This study          |
| JY938                                  | <i>oat-FLAG pclpS::FRT</i>                                                           | This study          |
| JY939                                  | <i>phoP::Tn10/pclpS-d</i>                                                            | This study          |
| JY981                                  | <i>oat::cat pclpS-d</i>                                                              | This study          |
| MS7953s                                | <i>phoP::Tn10</i>                                                                    | (59)                |
| Plasmids                               |                                                                                      |                     |
| pCP20                                  | <i>rep<sub>pSC101</sub><sup>ts</sup>   cl857 FLP Amp<sup>R</sup> Cat<sup>R</sup></i> | (58)                |
| pKD3                                   | <i>rep<sub>R6Kg</sub> Amp<sup>R</sup> FRT Cat<sup>R</sup> FRT</i>                    | (58)                |

**Table S1. Cont.**

| Strains                             | Relevant characteristics                                                                           | Source or reference |
|-------------------------------------|----------------------------------------------------------------------------------------------------|---------------------|
| pKD4                                | rep <sub>R6Kg</sub> Amp <sup>R</sup> FRT Km <sup>R</sup> FRT                                       | (58)                |
| pKD46                               | rep <sub>pSC101</sub> <sup>ts</sup> Amp <sup>R</sup> P <sub>araBAD</sub> -gbexo                    | (58)                |
| pET28+a                             | pBR332 <i>lacI</i> KmR pT7                                                                         | Novagen             |
| pET28+a- <i>clpS</i>                | pBR332 <i>lacI</i> KmR pT7- <i>clpS</i>                                                            | This study          |
| pET28+a- <i>clpA</i>                | pBR332 <i>lacI</i> KmR pT7- <i>clpA</i>                                                            | This study          |
| pET28+a- <i>clpP</i>                | pBR332 <i>lacI</i> KmR pT7- <i>clpP</i>                                                            | This study          |
| pUHE-21-2- <i>lacI</i> <sup>q</sup> | rep <sub>pMB1</sub> <i>lacI</i> <sup>q</sup> Amp <sup>R</sup>                                      | (61)                |
| pUHE- <i>clpS</i>                   | rep <sub>pMB1</sub> <i>lacI</i> <sup>q</sup> Amp <sup>R</sup> P <sub>lac</sub> - <i>clpS</i>       | (7)                 |
| pUHE- <i>ftsA</i> -FLAG             | rep <sub>pMB1</sub> <i>lacI</i> <sup>q</sup> Amp <sup>R</sup> P <sub>lac</sub> - <i>ftsA</i> -FLAG | This study          |
| pUHE- <i>uvrY</i> -FLAG             | rep <sub>pMB1</sub> <i>lacI</i> <sup>q</sup> Amp <sup>R</sup> P <sub>lac</sub> - <i>uvrY</i> -FLAG | This study          |



**Table S2. Primers used for strain or plasmid constructions or qRT-PCR**

| Primer number | Purpose                                                                                   | Sequence (5'–3')                                                                                |
|---------------|-------------------------------------------------------------------------------------------|-------------------------------------------------------------------------------------------------|
| 16494         | <i>oat</i> inactivation in <i>Salmonella</i>                                              | CCCCGCTAATCCCTGCAATACTTAATTCAGTATCATGTGTAGGCTGGAGCTGCTTC                                        |
| 16495         | <i>oat</i> inactivation in <i>Salmonella</i>                                              | AAACAGGCCGGATAAGCACAGCGCCATCCGGCATCGTTTTATGAATATCCTCCTTAGT                                      |
| 15945         | <i>aat</i> inactivation in <i>Salmonella</i>                                              | CCGACTTGCGTACTGGAGTTTCGCGTCATGTGTAGGCTGGAGCTGCTTC                                               |
| 15946         | <i>aat</i> inactivation in <i>Salmonella</i>                                              | TTAAGTACCTGACAATCAATAAGTTTATATGAATATCCTCCTTAGT                                                  |
| 16500         | <i>uvrY</i> inactivation in <i>Salmonella</i>                                             | TAAAGTTGTCGGTGAAGCGTGTGCGGAGAGGATGCGGTAGTGTAGGCTGGAGCTGCTTC                                     |
| 16501         | <i>uvrY</i> inactivation in <i>Salmonella</i>                                             | GATAGCGATAGCTGTTCCACCGTTTTAGGACTGAGATTGAGTATGAATATCCTCCTTAGT                                    |
| 16502         | Insertion of sequence for FLAG tag at C terminus of <i>ftsA</i> gene in <i>Salmonella</i> | GATCAAGCGACTTAATAGCTGGCTGCGAAAAGAGTTTGACTACAAGGA-<br>CGACGATGACAAGTAAGTGTAGGCTGGAGCTGCTTC       |
| 16503         | Insertion of sequence for FLAG tag at C terminus of <i>ftsA</i> gene in <i>Salmonella</i> | TGCCTGTCGCCTGAGGCCGTAATATCTGGCGCCTCATAATATGAATATCCTCCTTAGT                                      |
| 16504         | Insertion of sequence for FLAG tag at C terminus of <i>uvrY</i> gene in <i>Salmonella</i> | CCGCCATGGCCTGTGTAATGCGGAGACGTTAAACAAGCCAGGACTACAAGGACGACGATGAC-<br>AAGTGAGTGTAGGCTGGAGCTGCTTC   |
| 16505         | Insertion of sequence for FLAG tag at C terminus of <i>uvrY</i> gene in <i>Salmonella</i> | CGGTTTTCAAAAACGCCCTTGCGTCAAATATTCAGACACACCCTTGAATATGAATATCCTCCTTAGT                             |
| 16048         | Insertion of sequence for HA tag at C terminus of <i>clpS</i> gene in <i>Salmonella</i>   | GGAGAACGAGCATCCGTGCTGTGTACGCTGGA AAAAGCCTACCCATACGATGTTCCAGATTACGCT-<br>TGAGTGTAGGCTGGAGCTGCTTC |
| 16049         | Insertion of sequence for HA tag at C terminus of <i>clpS</i> gene in <i>Salmonella</i>   | TTCTTGATTGAGCATAGGCACCTCCCCCAATTTTTATACCTGTATGAATATCCTCCTTAGT                                   |
| 16050         | Insertion of sequence for HA tag at C terminus of <i>clpA</i> gene in <i>Salmonella</i>   | GAGTGCGCAAAAGCACAAAGCCGGAAGCCGCGCACTACCCATACGATGTTCCAGATTACGCTTAAGTG-<br>TAGGCTGGAGCTGCTTC      |
| 16051         | Insertion of sequence for HA tag at C terminus of <i>clpA</i> gene in <i>Salmonella</i>   | AGGCCCGGTTTTGTACGACAGTAAAACGAAGTATGAATATCCTCCTTAGT                                              |
| 15964         | Insertion of sequence for FLAG tag at C terminus of <i>patA</i> gene in <i>E. coli</i>    | GGCGCTGGCGCCATGCGAGTAAGTGTGGAAGAAGCGGACTACAAGGACGACGATGACAAGTAAGTG-<br>TAGGCTGGAGCTGCTTC        |
| 15965         | Insertion of sequence for FLAG tag at C terminus of <i>patA</i> gene in <i>E. coli</i>    | GATCGGATGGCGACGTCGTATCGCCATCCGATTTGTATGAATATCCTCCTTAGT                                          |
| 16009         | <i>clpS</i> inactivation in <i>E. coli</i>                                                | CCGATAACCGTAACCGAAGATGATAACTGACAGTGTAGGCTGGAGCTGCTTC                                            |
| 16010         | <i>clpS</i> inactivation in <i>E. coli</i>                                                | ATATCACTTTATACATAGATGGCGTTTTAGCTATGAATATCCTCCTTAGT                                              |
| 15937         | Amplification of <i>cigR</i> promoter region in <i>Salmonella</i>                         | TTTTTTATCAGGTTGCTCTGATAGCAATCATCC                                                               |
| 15938         | Amplification of <i>cigR</i> promoter region in <i>Salmonella</i>                         | GCCCTTCTGATGTGGGATACCATGAAAATAGCGCCCCGC                                                         |
| 15939         | Amplification of <i>mgtC</i> promoter region in <i>Salmonella</i>                         | GAACCCATTTTTTCTCGTCATGTT                                                                        |
| 15940         | Amplification of <i>mgtC</i> promoter region in <i>Salmonella</i>                         | TACGTTCCCTCCATTTTTTCTGGAAG                                                                      |
| 15933         | Amplification of <i>clpS</i> promoter region in <i>Salmonella</i>                         | ATTGTTGAACCACTTTACAGTACCCGTTTTC                                                                 |
| 15936         | Amplification of <i>clpS</i> promoter region in <i>Salmonella</i>                         | TTACCCATTGTCAGTCGTCATTATCGGTTACAG                                                               |
| 16437         | Amplification of <i>clpS</i> gene from <i>Salmonella</i> for protein purification         | TAACTTTAAGAAGGAGATATACCATGGGTAAGACGAACGATTGGCTG                                                 |
| 16437         | Amplification of <i>clpS</i> gene from <i>Salmonella</i> for protein purification         | CAGTGGTGGTGGTGGTGGTGCCTCGAGGGCTTTTTCCAGCGTACA                                                   |
| 16441         | Amplification of <i>clpA</i> gene from <i>Salmonella</i> for protein purification         | TAACTTTAAGAAGGAGATATACCATGCTCAATCAAGAACTGGAACCTCAGT                                             |
| 16442         | Amplification of <i>clpA</i> gene from <i>Salmonella</i> for protein purification         | CAGTGGTGGTGGTGGTGGTGCCTCGAGTTAGTGCAGGGCTTCCGG                                                   |

Table S2. Cont.

| Primer number | Purpose                                                                                | Sequence (5'-3')                                                                |
|---------------|----------------------------------------------------------------------------------------|---------------------------------------------------------------------------------|
| 16439         | Amplification of <i>clpP</i> gene from <i>Salmonella</i> for protein purification      | TAACTTTAAGAAGGAGATATACCATGTCATACAGCGGAGAACGAGATAAT                              |
| 16440         | Amplification of <i>clpP</i> gene from <i>Salmonella</i> for protein purification      | CAGTGGTGGTGGTGGTGGTGCCTCGAGATTACGATGGGTCAAATGAGTCAACCAA                         |
| 16618         | Amplification of <i>ftsA-flag</i> gene from <i>Salmonella</i> for protein purification | GCGGGATCCAATGATCAAGGCGACGACAGAAAACCTGGTAGTAGGACTGG                              |
| 16619         | Amplification of <i>ftsA-flag</i> gene from <i>Salmonella</i> for protein purification | GCGAAGCTTTTACTTGTTCATCGTCGTCCTTGTAGTCAAACCTTTTCGCGCCAGCT                        |
| 16620         | Amplification of <i>uvrY-flag</i> gene from <i>Salmonella</i> for protein purification | GCGGGATCCAATGATCAACGTTCTTCTTGTGTGATGACCACGAACTGGTGCGC                           |
| 16621         | Amplification of <i>uvrY-flag</i> gene from <i>Salmonella</i> for protein purification | GCGAAGCTTTCACTTGTTCATCGTCGTCCTTGTAGTCTGGCTTGTTAACGTCTCCGCA                      |
| 16627         | FRT insertion of <i>clpS</i> promoter in <i>Salmonella</i>                             | ATTGTTGAACCACCTTACAGTACCCGTTTCCATGTGTAGGCTGGAGCTGCTTC                           |
| 16628         | FRT insertion of <i>clpS</i> promoter in <i>Salmonella</i>                             | CCACTCCGTCACCGGTTCAATCCATCTTACTTATATAAGATTTACGAAGGATGTCGAAGTATGAATA-TCCTCCTTAGT |
| 15962         | PhoP-binding site inactivation of <i>clpS</i> promoter in <i>Salmonella</i>            | TTTAGAGAAAATCAGGCGAGGCGTCAAGGTGTAGGCTGGAGCTGCTTC                                |
| 15963         | PhoP-binding site inactivation of <i>clpS</i> promoter in <i>Salmonella</i>            | ATGGTTGAGTCATGGTTACCCGATCCCCCTGCCTGATGCTTGACGCCTATGAATATCCTCCTTAGT              |
| 15927         | qRT-PCR of <i>clpS</i> gene in <i>Salmonella</i>                                       | AGACGAACGATTGGCTGGATTTTGACC                                                     |
| 15928         | qRT-PCR of <i>clpS</i> gene in <i>Salmonella</i>                                       | TCATTGACTAATATCACTTTATAC                                                        |
| 15929         | qRT-PCR of <i>clpA</i> gene in <i>Salmonella</i>                                       | TCTTGTGTCGTCGCCGTAAA                                                            |
| 15930         | qRT-PCR of <i>clpA</i> gene in <i>Salmonella</i>                                       | AGCAGCGAACCAGATATCCAG                                                           |
| 15931         | qRT-PCR of <i>rssB</i> gene in <i>Salmonella</i>                                       | TCCTCTTTGGGAGCGACAAC                                                            |
| 15932         | qRT-PCR of <i>rssB</i> gene in <i>Salmonella</i>                                       | GAGACCGTTCATTCTCGGCA                                                            |
| 6492          | qRT-PCR of <i>pagC</i> gene in <i>Salmonella</i>                                       | CGGGTCTGTTGAGCCTGAAG                                                            |
| 6493          | qRT-PCR of <i>pagC</i> gene in <i>Salmonella</i>                                       | TAGGCTGGCCCAACCATTAA                                                            |
| 4493          | qRT-PCR of <i>slyB</i> gene in <i>Salmonella</i>                                       | CAAGTTCAGAATGTAACGTACGGTACT                                                     |
| 4494          | qRT-PCR of <i>slyB</i> gene in <i>Salmonella</i>                                       | GAATCATCACCGCCCTGAAT                                                            |
| 16506         | qRT-PCR of <i>uvrY</i> gene in <i>Salmonella</i>                                       | CCAGTTTGTCTGAACCGGAG                                                            |
| 16507         | qRT-PCR of <i>uvrY</i> gene in <i>Salmonella</i>                                       | AGCGATAGCTGTTACCCGTT                                                            |
| 16512         | qRT-PCR of <i>cspA</i> gene in <i>Salmonella</i>                                       | CAACGCTGATAAAGGCTTCGG                                                           |
| 16513         | qRT-PCR of <i>cspA</i> gene in <i>Salmonella</i>                                       | CGCTTTCGATGGTGAAGGAA                                                            |
| 16508         | qRT-PCR of <i>csrB</i> gene in <i>Salmonella</i>                                       | GACACGCCAGGATGGTGTTA                                                            |
| 16509         | qRT-PCR of <i>csrB</i> gene in <i>Salmonella</i>                                       | CTGATCGGCTCTCGTTCTCC                                                            |
| 15054         | qRT-PCR of <i>ompA</i> gene in <i>Salmonella</i>                                       | GGGCTGGTCTCAGTACCATGA                                                           |
| 15055         | qRT-PCR of <i>ompA</i> gene in <i>Salmonella</i>                                       | TCATGAGTCGGGCCATCA                                                              |

**Table S2. Cont.**

| Primer number | Purpose                                         | Sequence (5'-3')     |
|---------------|-------------------------------------------------|----------------------|
| 3023          | qRT-PCR of <i>rrs</i> gene in <i>Salmonella</i> | CCAGCAGCCGCGGTAAT    |
| 3024          | qRT-PCR of <i>rrs</i> gene in <i>Salmonella</i> | TTTACGCCAGTAATCCGATT |
| 15790         | qRT-PCR of <i>clpA</i> gene in <i>E. coli</i>   | GAAATCGAGAAAGCGCACCC |
| 15791         | qRT-PCR of <i>clpA</i> gene in <i>E. coli</i>   | CCACGTTACGGAAGTCTGCT |
| 15792         | qRT-PCR of <i>clpS</i> gene in <i>E. coli</i>   | AAGACGAACGATTGGCTGGA |
| 15793         | qRT-PCR of <i>clpS</i> gene in <i>E. coli</i>   | ACATAGATGGCGTTTTAGCG |
| 16496         | qRT-PCR of <i>ompA</i> gene in <i>E. coli</i>   | CCCGACCCATGAAAACCAAC |
| 16497         | qRT-PCR of <i>ompA</i> gene in <i>E. coli</i>   | TGAACGCCCTGAGCTTTGTA |
